# Supplementary material
Source: PubMed Central journal article supplement (PMC8244999)
Supplement: NIHMS1642069-supplement-1.pdf [file NIHMS1642069-supplement-1.pdf]

1 **Supplementary information for:**

2 **Activatable zymography probes enable in situ localization of protease dysregulation in**  
3 **cancer**

4  
5 **Authors:** Ava P. Soleimany<sup>1,2,3†</sup>, Jesse D. Kirkpatrick<sup>1,2†</sup>, Susan Su<sup>1,4</sup>, Jaideep S. Dudani<sup>1,5</sup>, Qian  
6 Zhong<sup>1</sup>, Ahmet Bekdemir<sup>1,2</sup>, Sangeeta N. Bhatia<sup>1,2,6-10\*</sup>

7  
8 **Affiliations:**

9 <sup>1</sup>Koch Institute for Integrative Cancer Research, Massachusetts Institute of Technology,  
10 Cambridge, MA 02139.

11 <sup>2</sup>Harvard-MIT Division of Health Sciences and Technology, Institute for Medical Engineering and  
12 Science, Massachusetts Institute of Technology, Cambridge, MA 02139.

13 <sup>3</sup>Harvard Graduate Program in Biophysics, Harvard University, Boston, MA 02115.

14 <sup>4</sup>Department of Mechanical Engineering, Massachusetts Institute of Technology, Cambridge, MA  
15 02139.

16 <sup>5</sup>Department of Biological Engineering, Massachusetts Institute of Technology, Cambridge, MA  
17 02139.

18 <sup>6</sup>Howard Hughes Medical Institute, Cambridge, MA 02139.

19 <sup>7</sup>Department of Electrical Engineering and Computer Science, Massachusetts Institute of  
20 Technology, Cambridge, MA 02139.

21 <sup>8</sup>Department of Medicine, Brigham and Women's Hospital, Harvard Medical School, Boston, MA  
22 02115.

23 <sup>9</sup>Broad Institute of Massachusetts Institute of Technology and Harvard, Cambridge, MA 02139.

24 <sup>10</sup>Wyss Institute at Harvard, Boston, MA 02115.

25 †These authors contributed equally to this work.

26 \*Corresponding author. Email: [sbhatia@mit.edu](mailto:sbhatia@mit.edu)

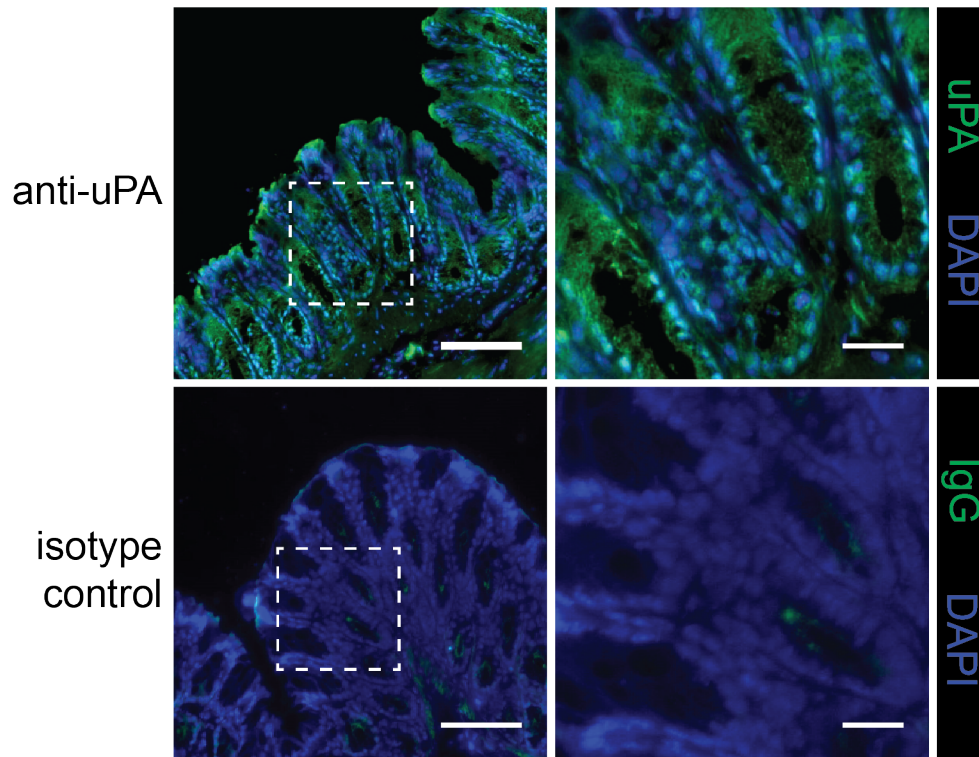

27  
28  
29  
30  
31  
32

**Supplementary Figure S1. uPA abundance in colon tissue sections.** Immunofluorescence staining for uPA (top, green) in fresh-frozen sections of healthy mouse colon. A consecutive section was stained with an IgG isotype control (bottom, green). Images on right show higher magnification view of boxed regions. Scale bars, left = 100 μm; scale bars, right = 25 μm.

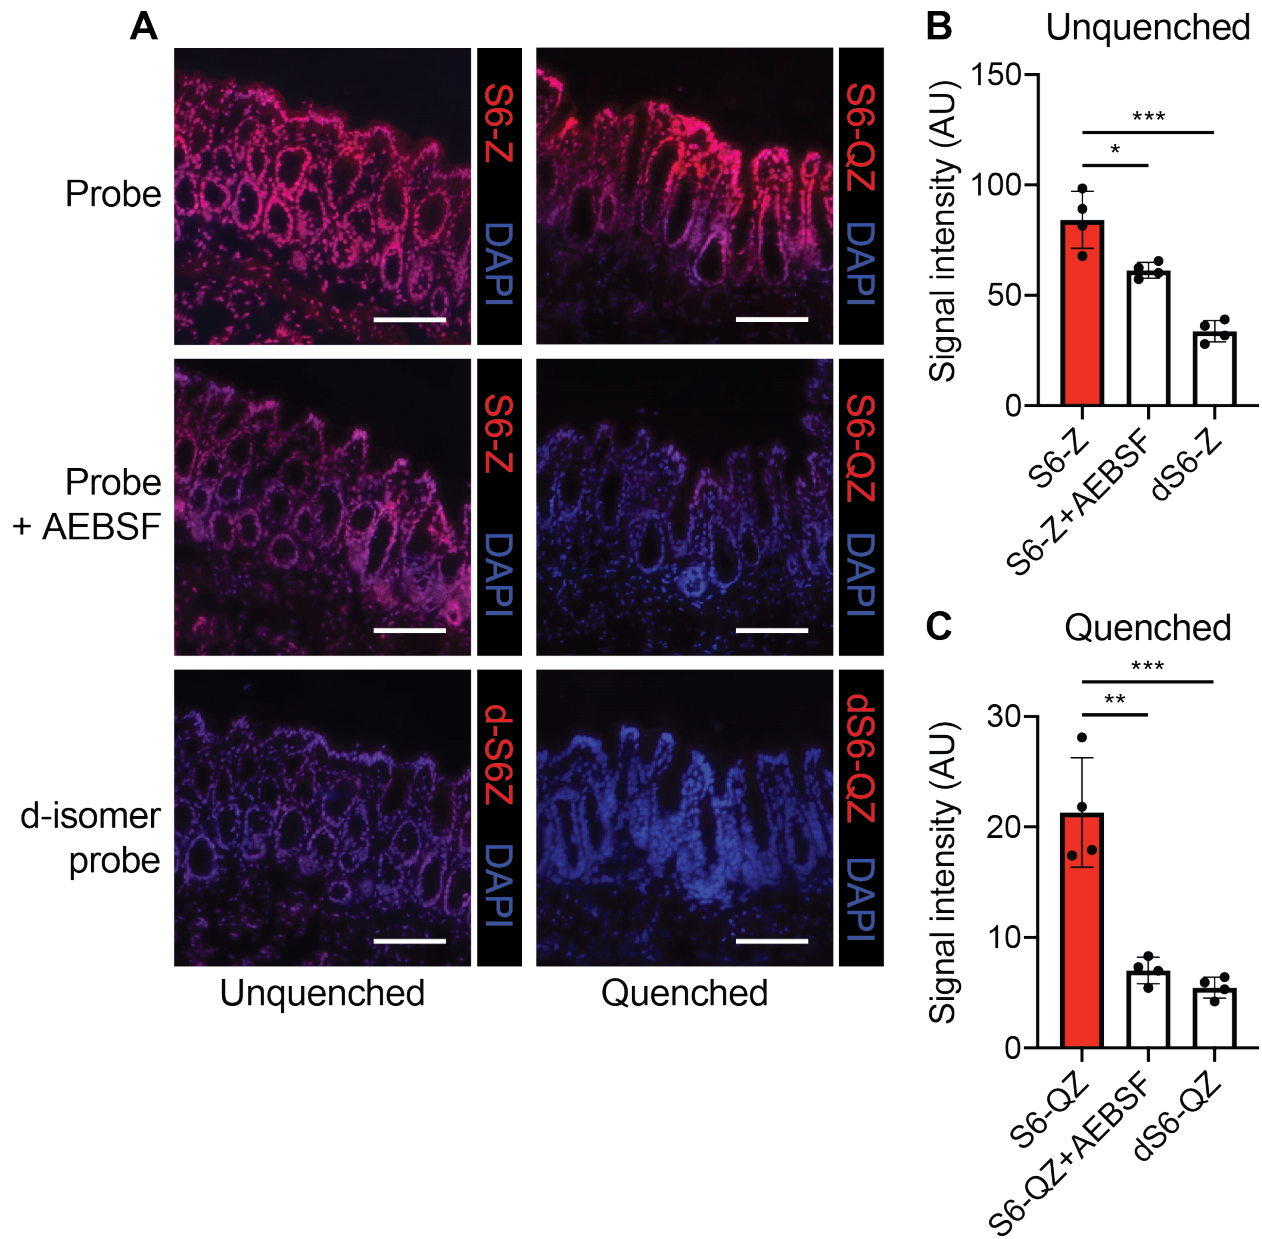

33  
 34  
 35  
 36  
 37  
 38  
 39  
 40  
 41  
 42  
 43  
 44  
 45  
 46

**Supplementary Figure S2. Comparison of unquenched and quenched AZPs.** **A**, Serine protease-cleavable unquenched and quenched AZPs, S6-Z and S6-QZ, respectively, were applied to fresh-frozen sections of healthy mouse colon. Staining of frozen colon sections with cleavable probes (S6-Z, S6-QZ; top, red), cleavable probes with the serine protease inhibitor AEBSF (middle, red), or the uncleavable *d*-stereoisomer probe (dS6-Z, dS6-QZ; bottom, red). All sections were counterstained with DAPI (blue). Different brightness settings were used for imaging staining of unquenched and quenched probes to enable visualization of differences in background probe binding. **B**, Fraction of detected nuclei positive for S6-Z or dS6-Z in epithelial regions of colon tissue sections ( $n = 4$  consecutive sections per group; mean  $\pm$  s.d.; two-tailed unpaired  $t$ -test,  $*P = 0.0145$ ,  $***P = 0.000340$ ). **C**, Fraction of detected nuclei positive for S6-QZ or dS6-QZ in epithelial regions of colon tissue sections ( $n = 4$  consecutive sections per group; mean  $\pm$  s.d.; two-tailed unpaired  $t$ -test,  $**P = 0.00135$ ,  $***P = 0.000748$ ). All scale bars = 100  $\mu$ m.

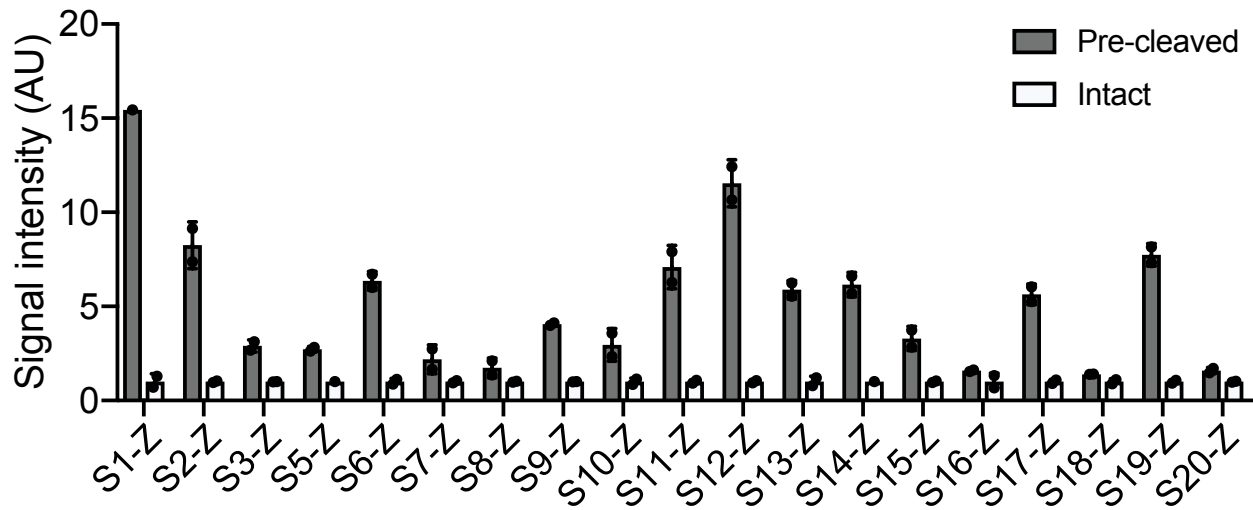

47  
48  
49  
50  
51  
52

**Supplementary Figure S3. AZP library characterization.** AZPs, either intact or with linkers pre-cleaved by a cognate recombinant protease, were applied to fresh-frozen colon tissue for 30 minutes, and fluorescent signal intensity of bound probes was quantified ( $n = 1-2$  replicates per probe; mean  $\pm$  s.d.).

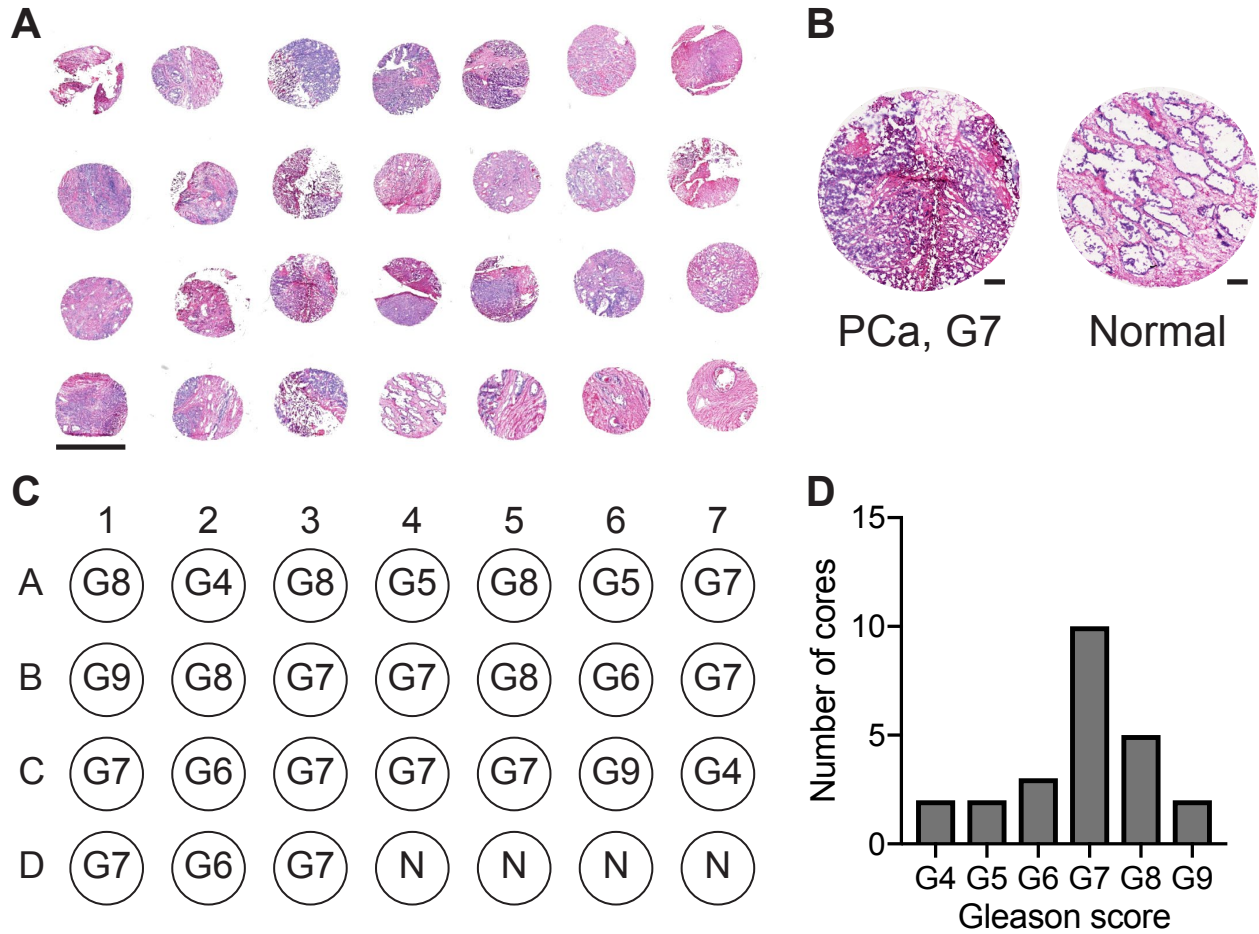

53  
54  
55  
56  
57  
58  
59

**Supplementary Figure S4. Fresh-frozen human prostate cancer tissue microarray (TMA).**  
**A**, H&E stain of human prostate cancer (PCa) TMA. Scale bar = 2 mm. **B**, Hematoxylin and eosin stain of select biopsy cores from Gleason 7 PCa tumor (left) and normal prostate (right). Scale bars = 200  $\mu$ m. **C**, TMA map detailing the Gleason scores (i.e., G4-G10) for prostate cancer specimens. N = normal. **D**, Distribution across Gleason scores for cores in the TMA.

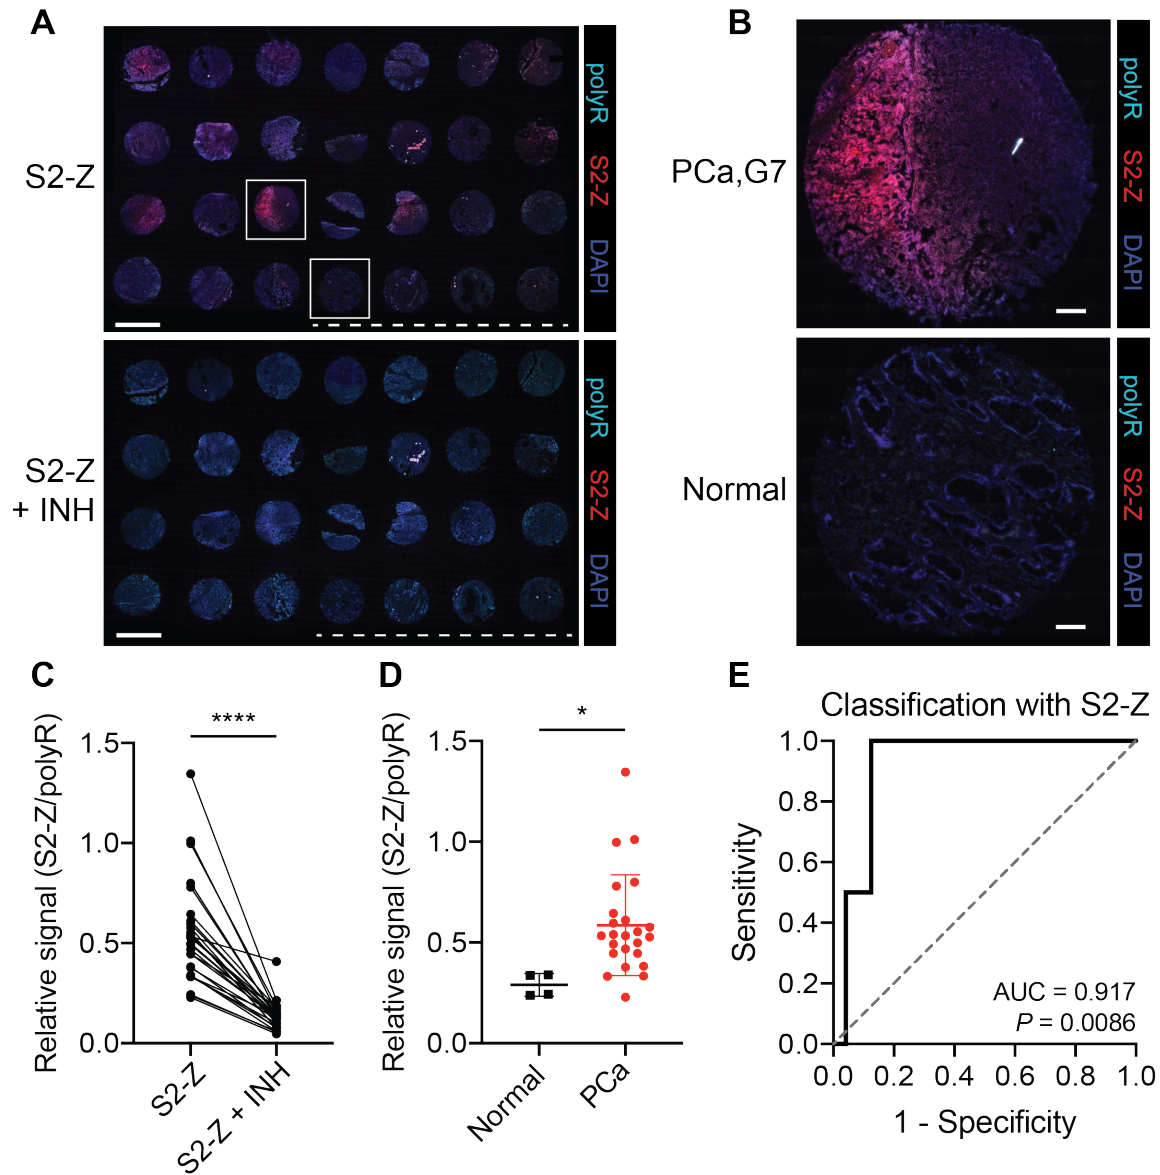

60  
 61  
 62  
 63  
 64  
 65  
 66  
 67  
 68  
 69  
 70  
 71  
 72  
 73  
 74  
 75

**Supplementary Figure S5. S2-Z selectively labels human PCa tissue.** **A**, Application of S2-Z AZP (red) to a human PCa tissue microarray (TMA) consisting of 24 prostate adenocarcinoma samples and 4 normal prostate samples (S2-Z, top). A consecutive TMA was stained with S2-Z along with a cocktail of protease inhibitors (S2-Z + INH, bottom). Sections were stained with a polyR binding control (teal) and counterstained with DAPI (blue). Dotted lines are shown below normal prostate samples. Scale bars = 2 mm. **B**, Higher-magnification image of boxed cores from (A) showing Gleason 7 PCa (top) and normal prostate (bottom). Scale bars = 200  $\mu$ m. **C**, Quantification of average S2-Z intensity relative to polyR (binding control) intensity across each TMA core ( $n = 28$ ) for sections incubated with (S2-Z + INH) and without (S2-Z) protease inhibitors (two-tailed paired  $t$ -test, \*\*\*\* $P < 0.0001$ ). **D**, Quantification of relative S2-Z intensity from normal ( $n = 4$ ) and PCa tumor ( $n = 24$ ) cores (mean  $\pm$  s.d.; two-tailed unpaired  $t$ -test, \* $P = 0.0284$ ). **E**, Receiver-operating characteristic (ROC) curve showing performance of relative AZP signal (S2-Z/polyR) in discriminating normal from PCa tumor cores (AUC = 0.917, 95% confidence interval 0.8103-1.000;  $P = 0.0086$  from random classifier shown in dashed line).

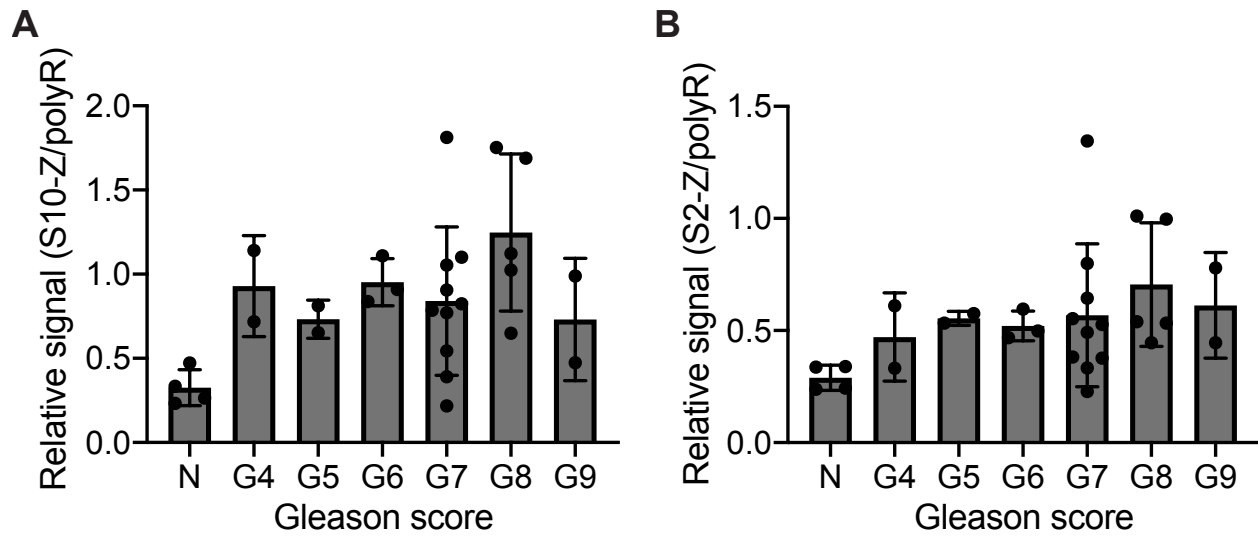

76  
77  
78  
79  
80

**Supplementary Figure S6. Distribution of AZP staining intensities in human PCa TMA.** Distribution of relative S10-Z (**A**) and S2-Z (**B**) intensities across Gleason scores across the TMA (N = normal; AZP intensities normalized to polyR binding control).

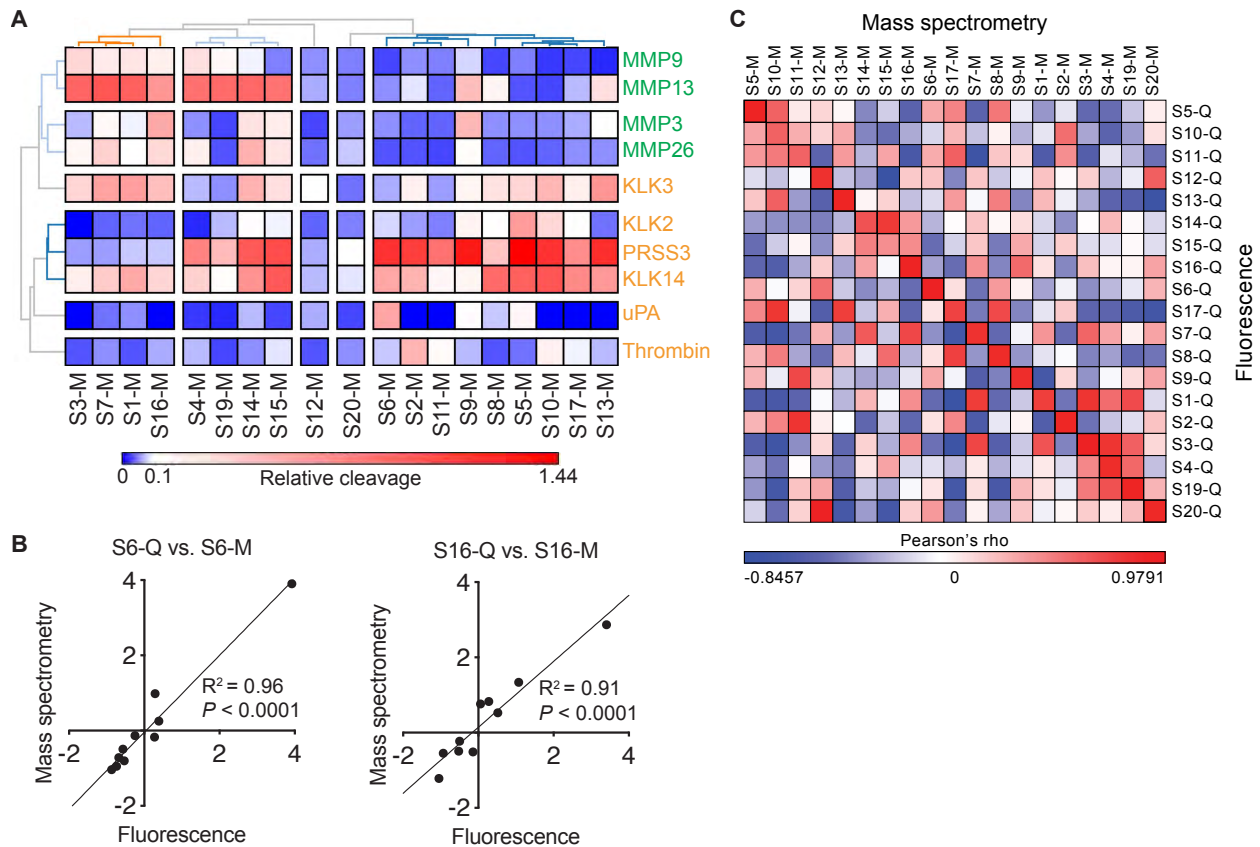

81  
82  
83  
84  
85  
86  
87  
88  
89  
90  
91  
92  
93  
94

**Supplementary Figure S7. Protease activity profiling with barcoded substrate libraries. A,** Heat map showing *in vitro* cleavage of mass-barcoded substrates (x-axis) by selected recombinant proteases (y-axis; metalloproteinases, green; serine proteases, yellow). Cleavage products were quantified by mass spectrometry, and unsupervised hierarchical clustering was performed ( $n = 2$  replicates per protease). **B,** Comparison of relative substrate cleavage z-scores for serine protease substrate S6-Q/S6-M (quenched/mass encoded, respectively) and metalloproteinase substrate S16-Q/S16-M (quenched/mass encoded, respectively), as measured by fluorescence with quenched substrates (x-axis) and mass spectrometry with bead-conjugated substrates (y-axis) (linear regression; S6  $R^2 = 0.96$ ,  $P < 0.0001$  from non-zero slope; S16  $R^2 = 0.91$ ,  $P < 0.0001$  from non-zero slope). **C,** Correlation of cleavage z-scores of FRET-paired free peptides to cleavage z-scores of mass-barcoded peptides conjugated to the surface of magnetic beads, calculated as Pearson's rho across all proteases using cleavage z-scores.



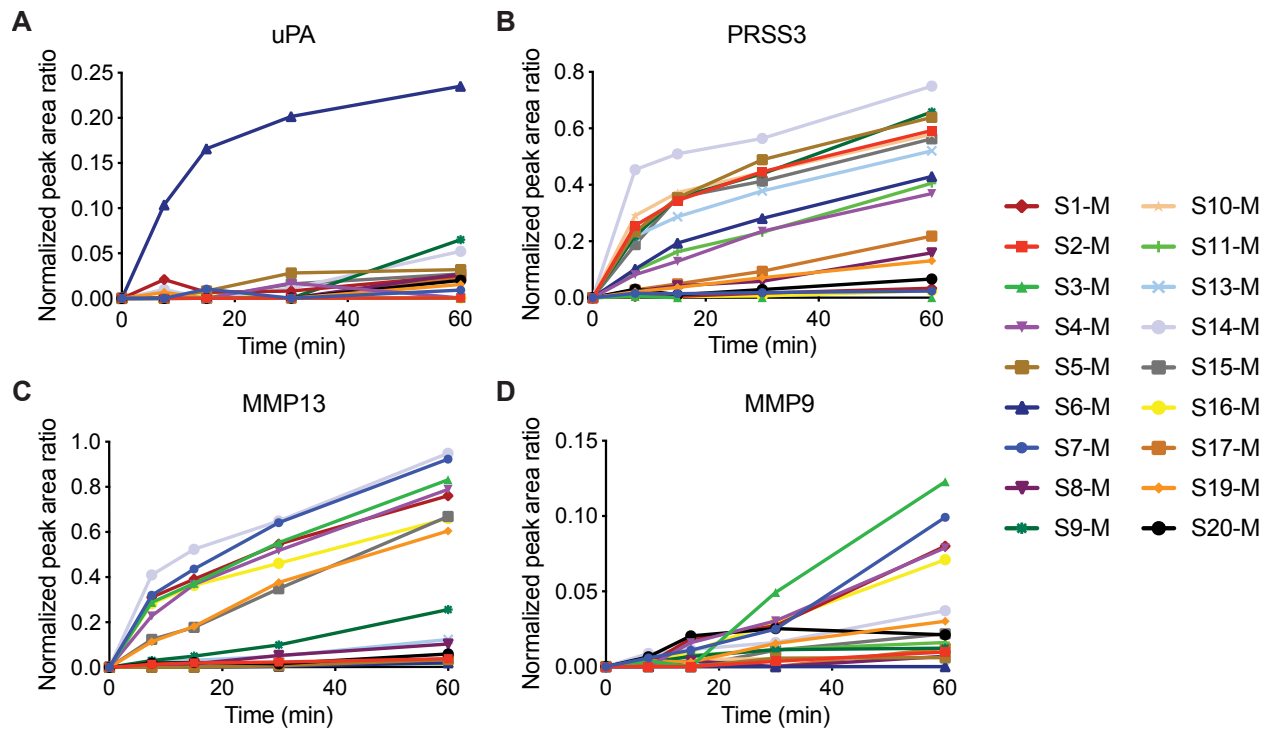

95  
96  
97  
98  
99  
100  
101  
102

**Supplementary Figure S8. Profiling cleavage kinetics using mass-barcoded bead library.** Kinetics of substrate cleavage obtained from mass-barcoded library screen for the serine proteases uPA (**A**) and PRSS3 (**B**) and the metalloproteinases MMP13 (**C**) and MMP9 (**D**). Kinetics were assessed via quantification of liberated barcodes isolated via magnetic separation at various time points after addition of protease, followed by mass spectrometry quantification with LC-MS/MS. Lines represent means of two independent measurements.

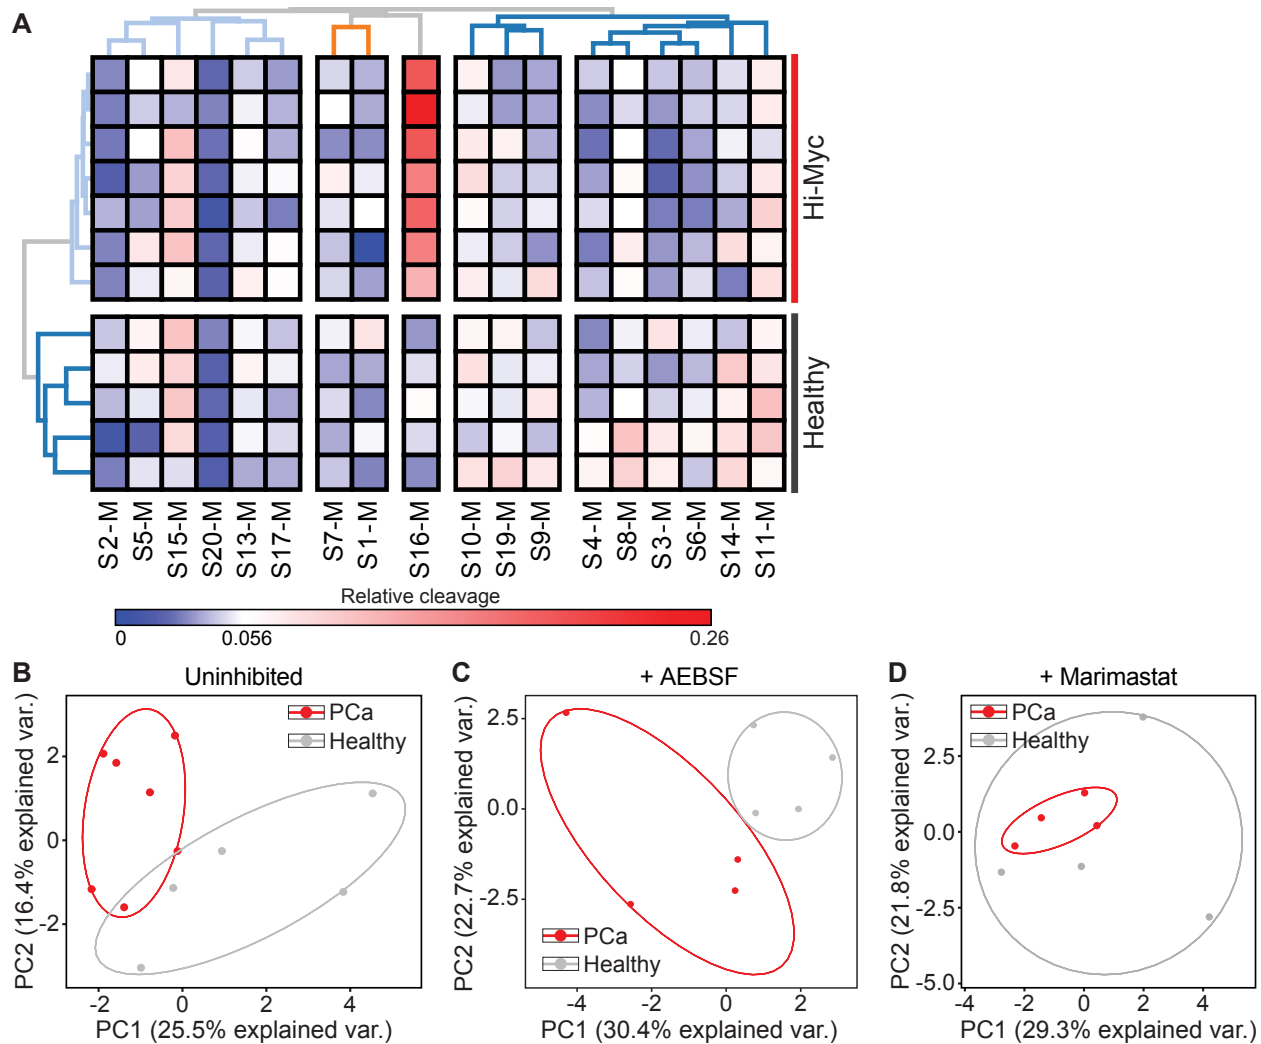

103  
 104  
 105  
 106  
 107  
 108  
 109  
 110  
 111  
 112

**Supplementary Figure S9. Differential cleavage of peptide S16 is driven by MMP dysregulation and drives differentiation of Hi-Myc from healthy prostates.** **A**, Hierarchical clustering of cleavage data from multiplexed protease substrate screen of mass-encoded bead library against homogenates of prostates from healthy (gray,  $n = 5$ ) and Hi-Myc (red,  $n = 7$ ) mice. **B-D**, Principal component analysis (PCA) of cleavage data from homogenates incubated without inhibitor (B), with the serine protease inhibitor AEBSF (C), or with the metalloproteinase inhibitor marimastat (D).

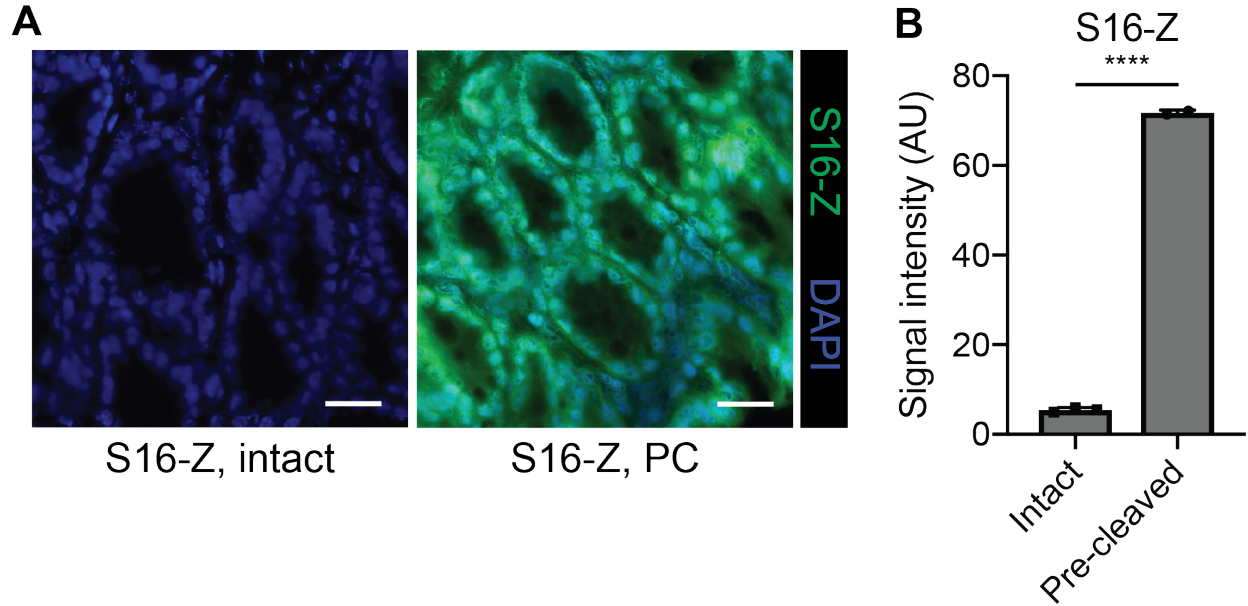

113  
114

115 **Supplementary Figure S10. S16-Z tissue binding depends on proteolytic cleavage. A,**  
 116 **Binding of intact or MMP12 pre-cleaved (PC) S16-Z (green) to fresh-frozen mouse colon tissue**  
 117 **following incubation at 4° C. Sections were counterstained with DAPI (blue). Scale bars = 25 μm.**  
 118 **B, Quantification of S16-Z binding for intact probe or probe pre-cleaved by MMP12 ( $n = 2-3$**   
 119 **replicates; mean  $\pm$  s.d.; two-tailed unpaired  $t$ -test, \*\*\*\* $P < 0.0001$ ).**

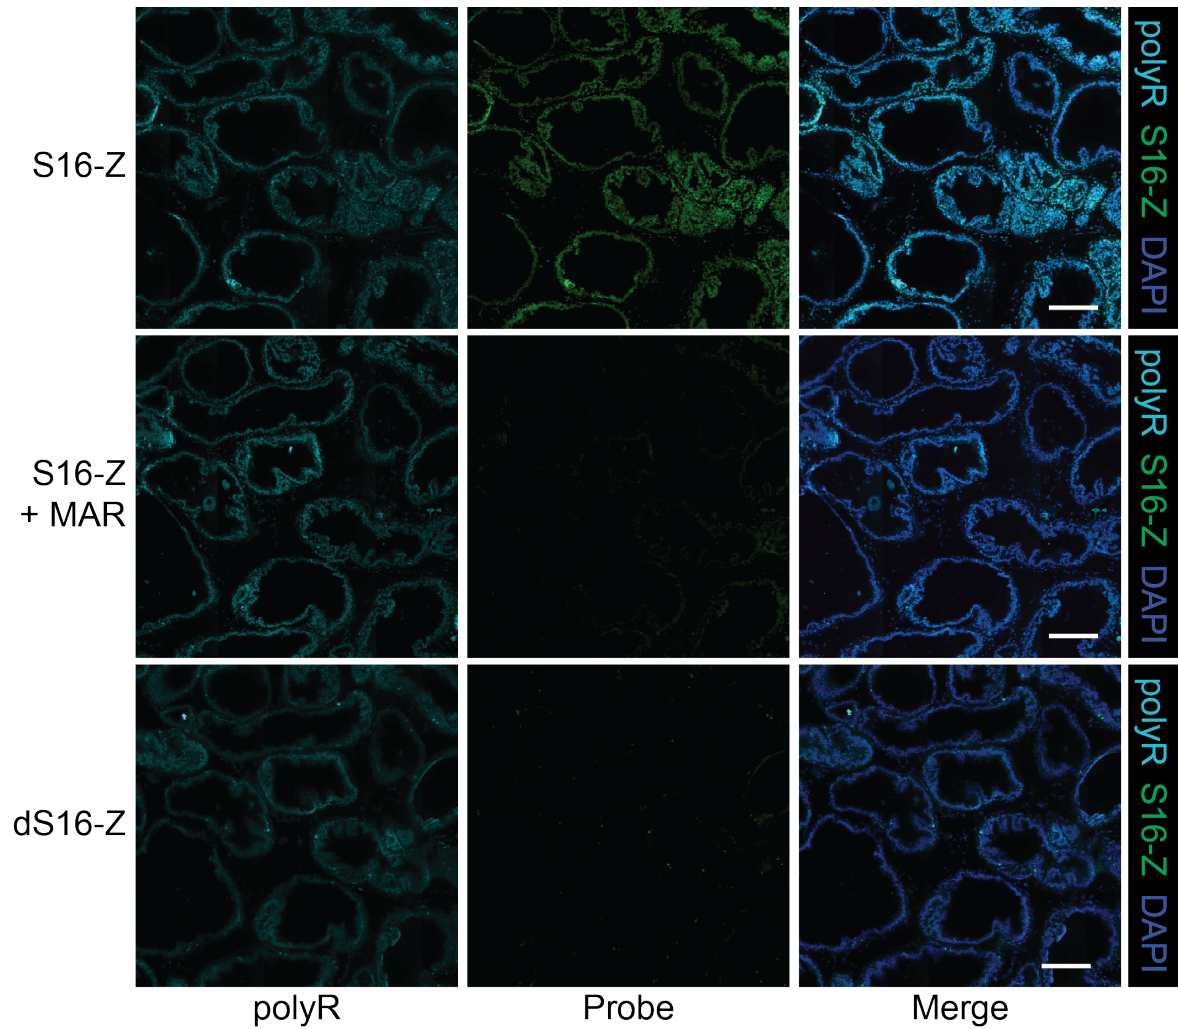

120  
121  
122  
123  
124  
125  
126

**Supplementary Figure S11. S16-Z labeling of Hi-Myc tissue is dependent on *in situ* MMP activity.** Staining of Hi-Myc tissue with polyR (left column, teal) and either MMP-activatable S16-Z (top and middle rows; green) or *d*-stereoisomer dS16-Z (bottom row; green). Top and middle rows show staining of consecutive sections without (top) and with (middle) the MMP inhibitor marimastat (MAR). Sections were counterstained with DAPI (blue). Scale bars = 200  $\mu$ m.

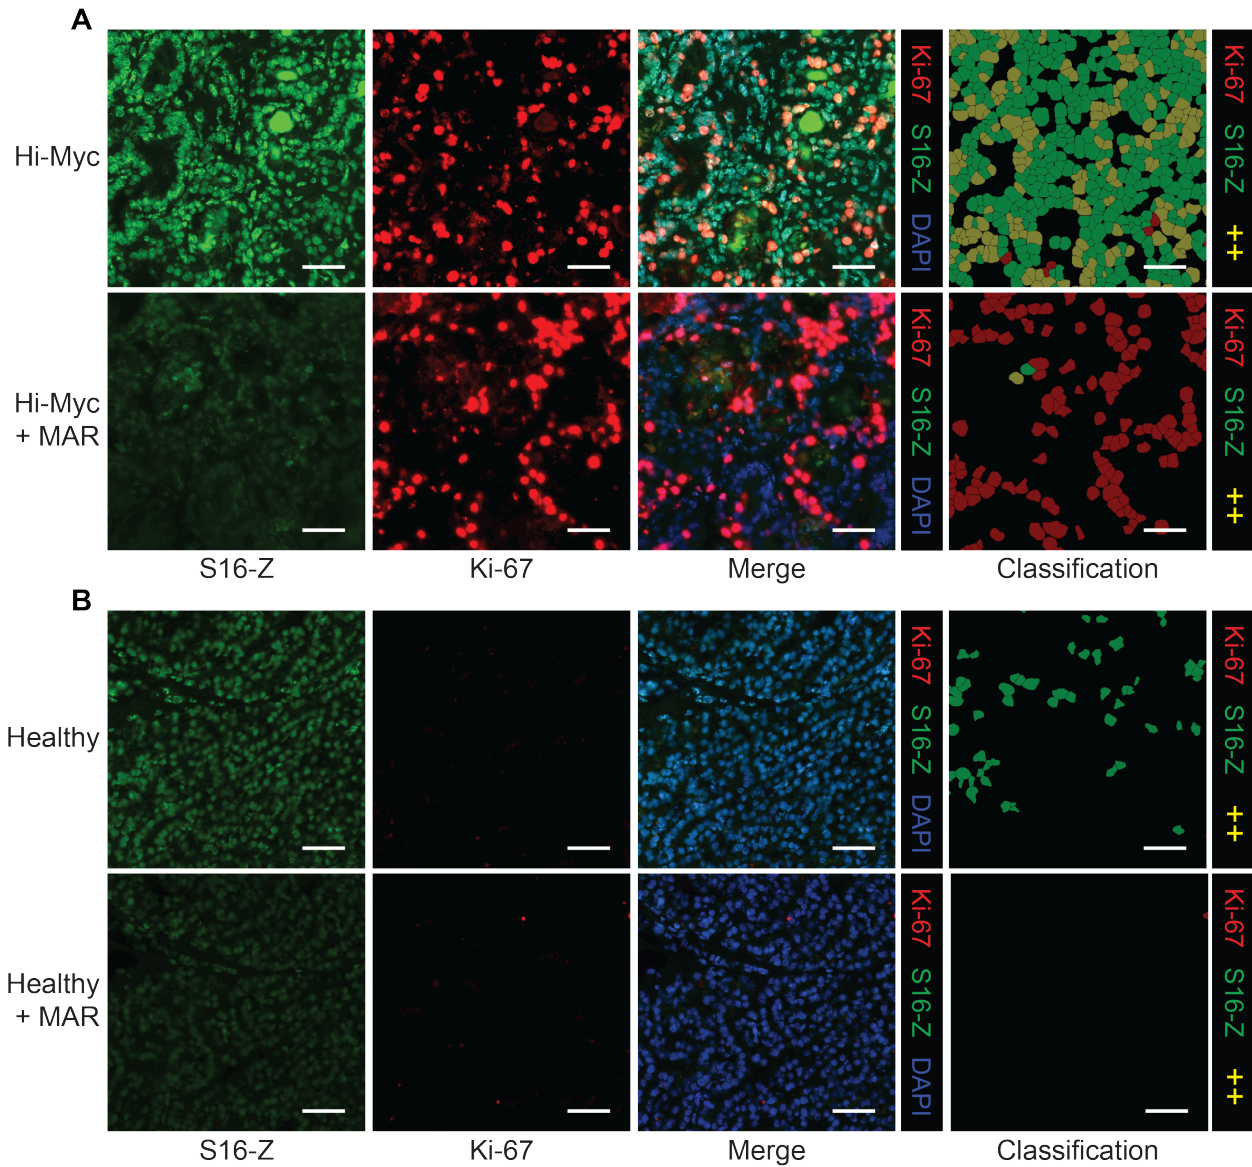

127  
128

129 **Supplementary Figure S12. MMP activity drives S16-Z labeling of proliferative tumor**  
 130 **regions in Hi-Myc prostates. A, B,** Staining of Hi-Myc tumor region (A) and healthy prostate  
 131 tissue (B) with S16-Z (green) with co-staining for the proliferation marker Ki-67 (red). Consecutive  
 132 sections were stained with S16-Z and Ki-67 in the presence of marimastat (MAR). Sections were  
 133 counterstained with DAPI (blue). Detected cells were classified on the basis of S16-Z and Ki-67  
 134 staining intensities to produce cellular classification maps (green: S16-Z+, red: Ki-67+, yellow:  
 135 S16-Z+ and Ki-67+). Scale bars = 50  $\mu$ m.

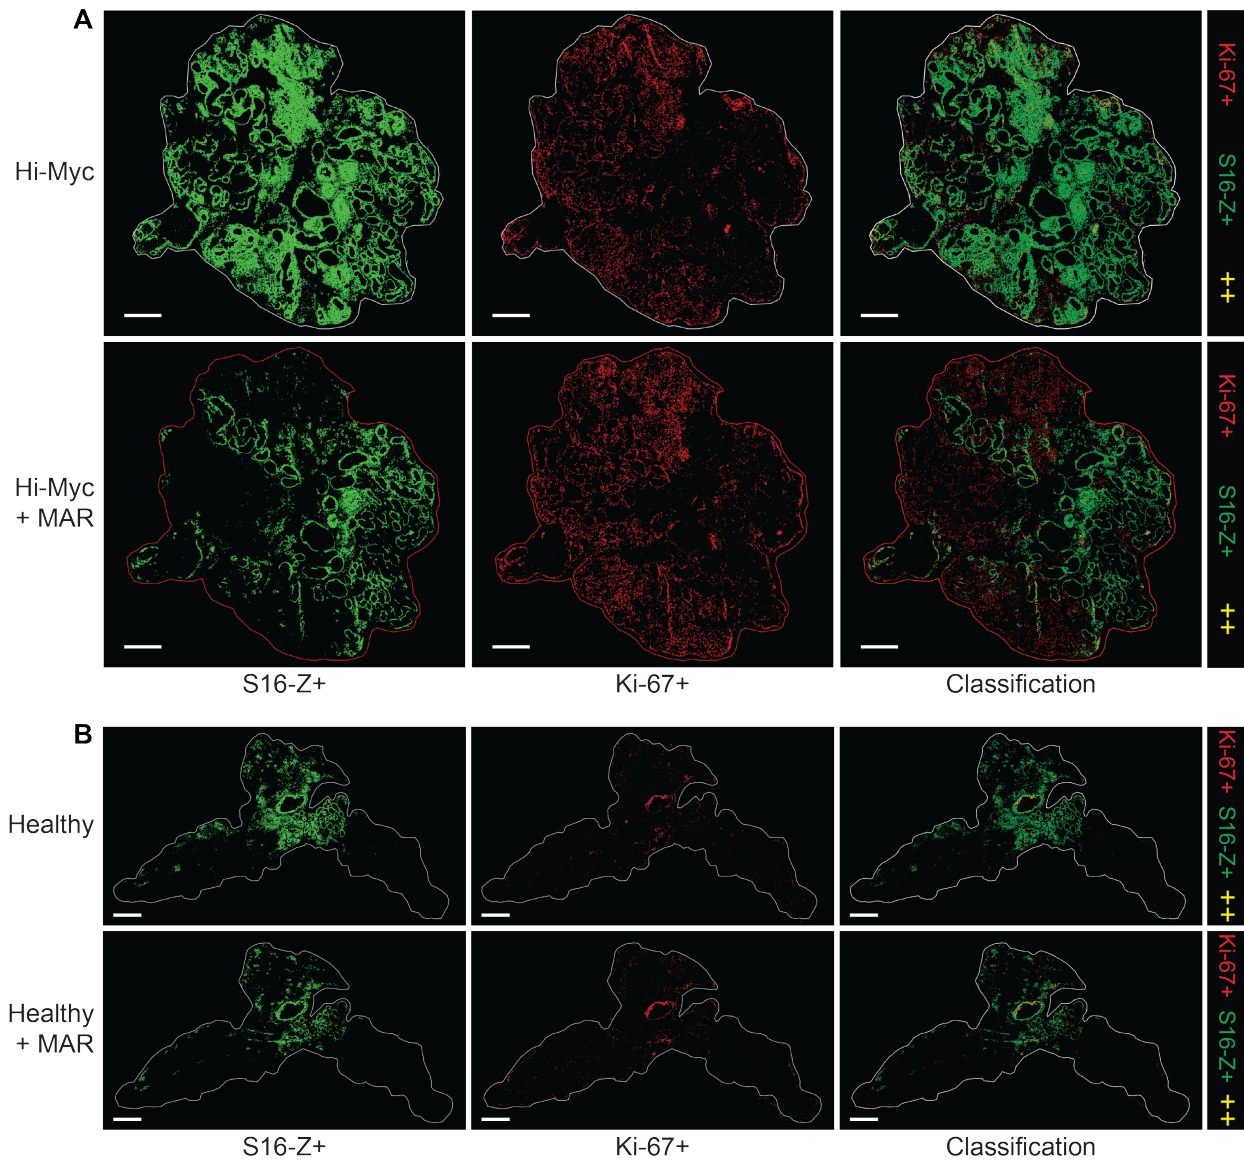

136  
137  
138  
139  
140  
141  
142  
143

**Supplementary Figure S13. S16-Z and Ki-67 staining of healthy and Hi-Myc prostate whole tissue sections. A, B,** S16-Z, with or without MAR, was applied to prostate tissues from Hi-Myc (A) and healthy (B) mice with co-staining for the proliferation marker Ki-67. Detected cells were classified on the basis of S16-Z and Ki-67 staining intensities to produce classification maps of whole tissue sections (green: S16-Z+, red: Ki-67+, yellow: S16-Z+ and Ki-67+). Scale bars = 1 mm.

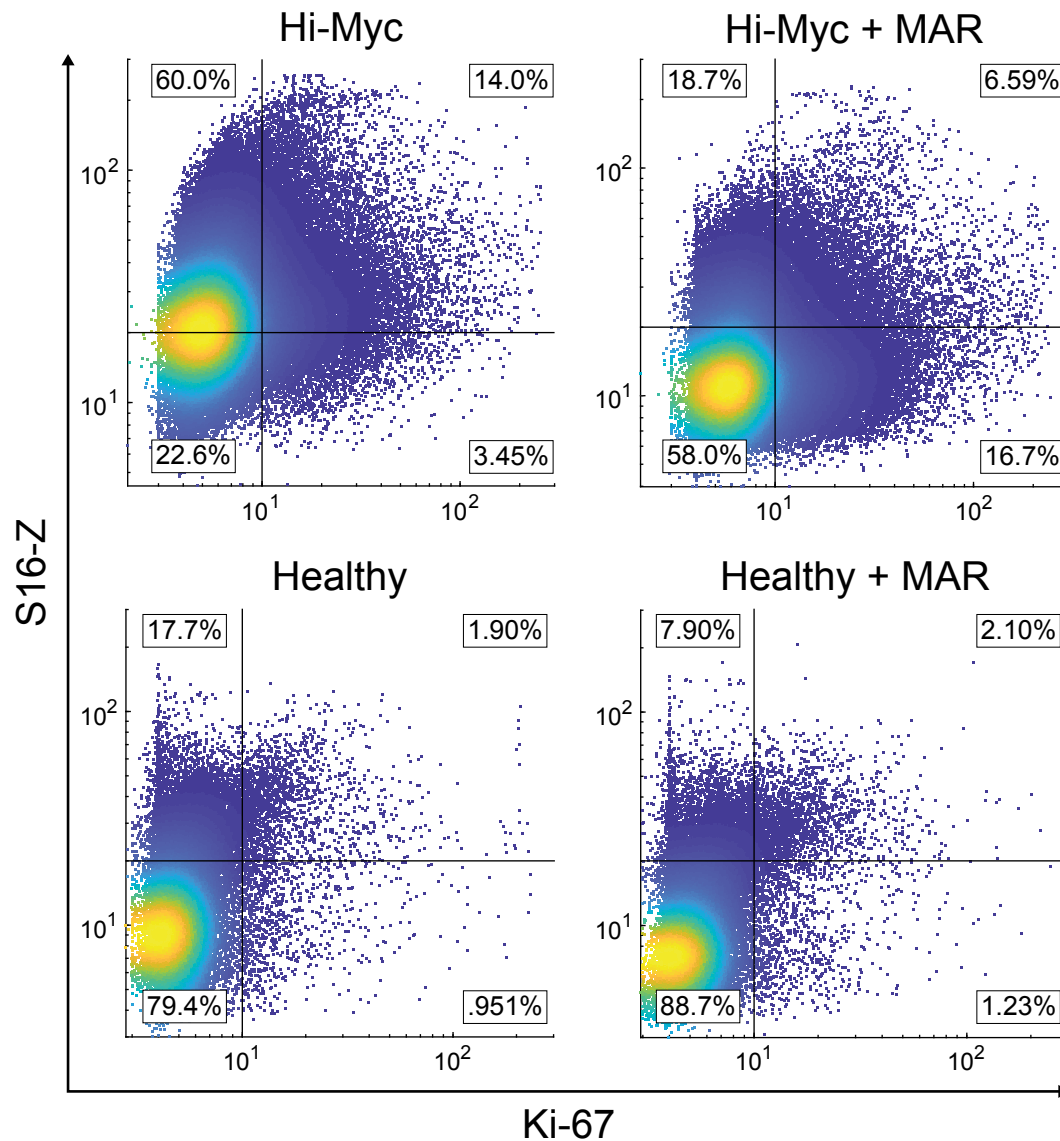

144  
 145  
 146  
 147  
 148  
 149  
 150

**Supplementary Figure S14. Whole sample, cell-by-cell quantification of S16-Z and Ki-67 fluorescent staining.** Cell-by-cell quantification of S16-Z and Ki-67 fluorescence intensity in detected nuclei from representative Hi-Myc and healthy prostate tissue sections incubated with or without the MMP inhibitor marimastat (MAR). Lines represent thresholds for positivity for each of the markers.

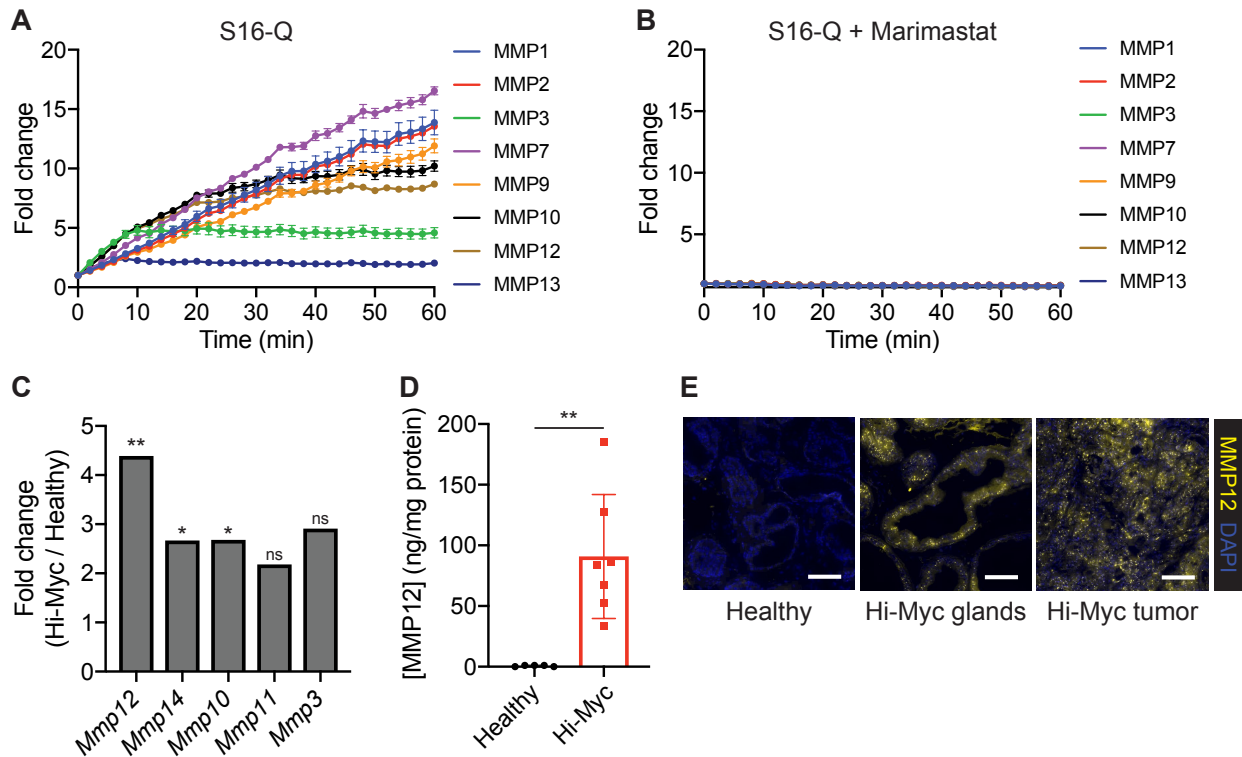

151  
 152  
 153  
 154  
 155  
 156  
 157  
 158  
 159  
 160  
 161  
 162  
 163  
 164  
 165  
 166

**Supplementary Figure S15. Characterization of MMP12 dysregulation in the Hi-Myc model.**

**A**, Fluorescent dequenching measurements for panel of MMPs against fluorescent version (S16-Q) of Hi-Myc-responsive substrate S16 ( $n = 2$  replicates per protease; mean  $\pm$  s.d.). **B**, Addition of MMP inhibitor marimastat (MAR) abrogated fluorescence increase for panel of MMPs against S16-Q ( $n = 2$  replicates per protease; mean  $\pm$  s.d.). **C**, Relative expression of the top 5 MMPs most significantly upregulated in Hi-Myc prostates relative to age-matched healthy controls, analyzed by Affymetrix microarray, adapted from Ellwood-Yen et al., *Cancer Cell* 2003<sup>1</sup> (two-tailed unpaired  $t$ -test;  $**P < 0.01$ ,  $*P < 0.05$ , ns = not significant). **D**, Enzyme-linked immunosorbent assay (ELISA) results comparing protein-level abundance of MMP12 in homogenates of Hi-Myc prostates relative to age-matched healthy controls ( $n = 7$  Hi-Myc,  $n = 5$  healthy; mean  $\pm$  s.d.; Welch's unequal variances  $t$ -test;  $**P = 0.0034$ ). **E**, Immunofluorescence staining for MMP12 (yellow) in fresh-frozen sections of healthy and Hi-Myc prostates, showing histologically similar regions of healthy and Hi-Myc prostates (Healthy, Hi-Myc glands) as well as a Hi-Myc tumor region (Hi-Myc tumor). Scale bars = 100  $\mu$ m.



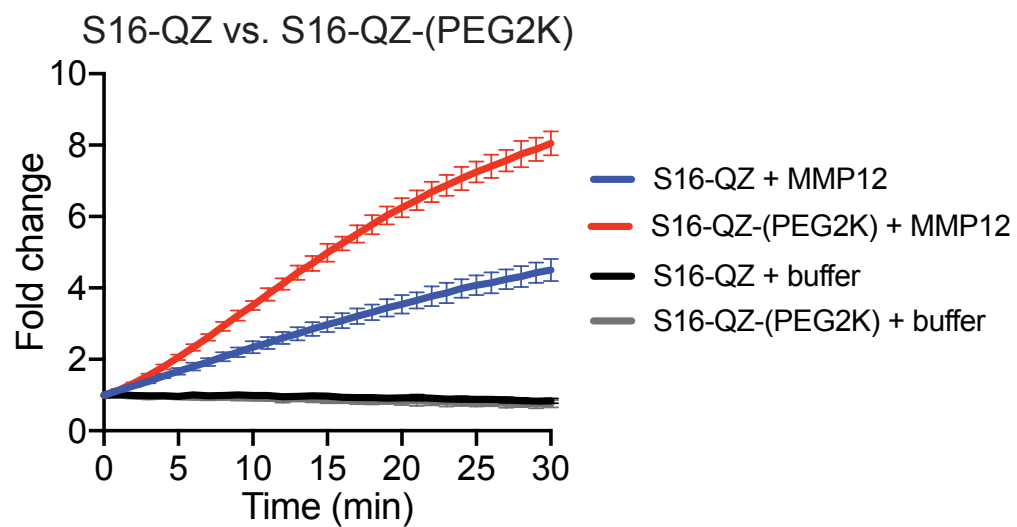

167  
168  
169  
170  
171  
172

**Supplementary Figure S16. Cleavage of PEGylated imaging probe.** The quenched probe S16-QZ and the PEGylated version, S16-QZ-(PEG2K), were incubated with recombinant MMP12, and fluorescence activation was monitored over time ( $n = 4$  replicates; mean  $\pm$  s.d.).

**Supplementary Table S1. Peptide sequences used throughout the study.**

| Name  | Sequence                                                | Readout (sample type)             |
|-------|---------------------------------------------------------|-----------------------------------|
| S1-Q  | (5FAM)-GGPQGIWGQ-K(CPQ2)-(PEG2)-C-NH2                   | Fluorescence (in vitro / ex vivo) |
| S2-Q  | (5FAM)-GGLVPRGSG-K(CPQ2)-(PEG2)-C-NH2                   | Fluorescence (in vitro / ex vivo) |
| S3-Q  | (5FAM)-GGPVGLIG-K(CPQ2)-(PEG2)-C-NH2                    | Fluorescence (in vitro / ex vivo) |
| S4-Q  | (5FAM)-GGPLGVRGK-K(CPQ2)-(PEG2)-C-NH2                   | Fluorescence (in vitro / ex vivo) |
| S5-Q  | (5FAM)-GRQRRALEKG-K(CPQ2)-(PEG2)-GC-NH2                 | Fluorescence (in vitro / ex vivo) |
| S6-Q  | (5FAM)-GGGSGRSANAKG-K(CPQ2)-(PEG2)-GC-NH2               | Fluorescence (in vitro / ex vivo) |
| S7-Q  | (5FAM)-GKPISLISSG-K(CPQ2)-(PEG2)-GC-NH2                 | Fluorescence (in vitro / ex vivo) |
| S8-Q  | (5FAM)-GILSRIVGGG-K(CPQ2)-(PEG2)-GC-NH2                 | Fluorescence (in vitro / ex vivo) |
| S9-Q  | (5FAM)-GRPKPVE(Nval)WRKG-K(CPQ2)-(PEG2)-GC-NH2          | Fluorescence (in vitro / ex vivo) |
| S10-Q | (5FAM)-GIQQRSLGGG-K(CPQ2)-(PEG2)-GC-NH2                 | Fluorescence (in vitro / ex vivo) |
| S11-Q | (5FAM)-GGVPRGG-K(CPQ2)-(PEG2)-GC-NH2                    | Fluorescence (in vitro / ex vivo) |
| S12-Q | (5FAM)-GSGSKIIGGG-K(CPQ2)-(PEG2)-GC-NH2                 | Fluorescence (in vitro / ex vivo) |
| S13-Q | (5FAM)-GAANLTRG-K(CPQ2)-(PEG2)-GC-NH2                   | Fluorescence (in vitro / ex vivo) |
| S14-Q | (5FAM)-GLAQAPhe(homo)RSG-K(CPQ2)-(PEG2)-GC-NH2          | Fluorescence (in vitro / ex vivo) |
| S15-Q | (5FAM)-GSPLAQAVRSSG-K(CPQ2)-(PEG2)-GC-NH2               | Fluorescence (in vitro / ex vivo) |
| S16-Q | (5FAM)-GPVPLSLVMG-K(CPQ2)-(PEG2)-GC-NH2                 | Fluorescence (in vitro / ex vivo) |
| S17-Q | (5FAM)-GSQPRIVGGG-K(CPQ2)-(PEG2)-GC-NH2                 | Fluorescence (in vitro / ex vivo) |
| S19-Q | (5FAM)-GGLGPKGQTG-K(CPQ2)-(PEG2)-C-NH2                  | Fluorescence (in vitro / ex vivo) |
| S20-Q | (5FAM)-GGQTCKCCK-K(CPQ2)-(PEG2)-C-NH2                   | Fluorescence (in vitro / ex vivo) |
| S1-M  | e(+2G)(+6V)ndneeG(+10F)(+1F)s(+1A)r-ANP-GGPQGIWQGC      | LC-MS/MS (in vitro / ex vivo)     |
| S2-M  | eG(+6V)ndneeGF(+1F)s(+1A)r-ANP-GGLVPRGSGGC              | LC-MS/MS (in vitro / ex vivo)     |
| S3-M  | e(+3G)(+1V)ndneeGFFs(+4A)r-ANP-GGPVGLIGGC               | LC-MS/MS (in vitro / ex vivo)     |
| S4-M  | e(+2G)Vndnee(+2G)FFs(+4A)r-ANP-GGPLGVRGKGC              | LC-MS/MS (in vitro / ex vivo)     |
| S5-M  | e(+3G)(+1V)ndneeG(+10F)FsAr-ANP-GRQRRALEKGC             | LC-MS/MS (in vitro / ex vivo)     |
| S6-M  | e(+2G)Vndnee(+2G)F(+10F)sAr-ANP-GGGSGRSANAKGC           | LC-MS/MS (in vitro / ex vivo)     |
| S7-M  | e(+2G)(+6V)ndneeGFFsAr-ANP-GKPISLISSGC                  | LC-MS/MS (in vitro / ex vivo)     |
| S8-M  | eGVndneeGF(+10F)s(+4A)r-ANP-GILSRIVGGGC                 | LC-MS/MS (in vitro / ex vivo)     |
| S9-M  | eG(+6V)ndneeG(+10F)Fs(+4A)r-ANP-GRPKPVE(Nval)WRKGC      | LC-MS/MS (in vitro / ex vivo)     |
| S10-M | e(+3G)(+1V)ndnee(+2G)(+10F)Fs(+4A)r-ANP-GIQQRSLGGGC     | LC-MS/MS (in vitro / ex vivo)     |
| S11-M | e(+2G)Vndnee(+3G)(+10F)(+1F)s(+4A)r-ANP-GGVPRGGC        | LC-MS/MS (in vitro / ex vivo)     |
| S12-M | eGVndneeG(+10F)(+10F)sAr-ANP-GSGSKIIGGC                 | LC-MS/MS (in vitro / ex vivo)     |
| S13-M | e(+2G)(+6V)ndnee(+3G)(+10F)(+1F)s(+4A)r-ANP-GAANLTRGC   | LC-MS/MS (in vitro / ex vivo)     |
| S14-M | eG(+6V)ndneeG(+10F)(+10F)sAr-ANP-GLAQAPhe(homo)RSGC     | LC-MS/MS (in vitro / ex vivo)     |
| S15-M | e(+3G)(+1V)ndnee(+2G)(+10F)(+10F)sAr-ANP-GSPLAQAVRSSGC  | LC-MS/MS (in vitro / ex vivo)     |
| S16-M | e(+2G)VndneeG(+10F)(+10F)s(+4A)r-ANP-GPVPLSLVMGC        | LC-MS/MS (in vitro / ex vivo)     |
| S17-M | eGVndnee(+2G)(+10F)(+10F)s(+4A)r-ANP-GSQPRIVGGGC        | LC-MS/MS (in vitro / ex vivo)     |
| S19-M | e(+2G)(+6V)ndnee(+3G)(+1F)(+1F)s(+1A)r-ANP-GGLGPKGQTGGC | LC-MS/MS (in vitro / ex vivo)     |
| S20-M | eG(+6V)ndnee(+3G)(+1F)Fs(+4A)r-ANP-GGQTCKCCKGC          | LC-MS/MS (in vitro / ex vivo)     |

|         |                                                        |                                  |
|---------|--------------------------------------------------------|----------------------------------|
| S1-Z    | U-eeeeeeee-X-GGPQGIWGQG-rrrrrrrr-X-K(Cy3)-NH2          | Fluorescence (in situ)           |
| S2-Z    | U-eeeeeeee-X-GGLVPRGSGG-rrrrrrrr-X-K(Cy5)-NH2          | Fluorescence (in situ)           |
| S3-Z    | U-eeeeeeee-X-GGPVGLIGG-rrrrrrrr-X-K(5FAM)-NH2          | Fluorescence (in situ)           |
| S4-Z    | U-eeeeeeee-X-GPLGVRGKG-rrrrrrrr-X-K(5FAM)-NH2          | Fluorescence (in situ)           |
| S5-Z    | U-eeeeeeee-X-GRQRRALEKG-rrrrrrrr-X-K(Cy3)-NH2          | Fluorescence (in situ)           |
| S6-Z    | U-eeeeeeee-X-GSGRSANAG-rrrrrrrr-X-K(Cy5)-NH2           | Fluorescence (in situ)           |
| S7-Z    | U-eeeeeeee-X-GKPISLISSG-rrrrrrrr-X-K(5FAM)-NH2         | Fluorescence (in situ)           |
| S8-Z    | U-eeeeeeee-X-GILSRIVGGG-rrrrrrrr-X-K(5FAM)-NH2         | Fluorescence (in situ)           |
| S9-Z    | U-eeeeeeee-X-GRP KPVE(Nval)WRKG-rrrrrrrr-X-K(5FAM)-NH2 | Fluorescence (in situ)           |
| S10-Z   | U-eeeeeeee-X-GIQQRSLGGG-rrrrrrrr-X-K(5FAM)-NH2         | Fluorescence (in situ)           |
| S11-Z   | U-eeeeeeee-X-GGGVPRGGG-rrrrrrrr-X-K(5FAM)-NH2          | Fluorescence (in situ)           |
| S12-Z   | U-eeeeeeee-X-GSGSKIIGGG-rrrrrrrr-X-K(Cy3)-NH2          | Fluorescence (in situ)           |
| S13-Z   | U-eeeeeeee-X-GGAANLTRGG-rrrrrrrr-X-K(Cy3)-NH2          | Fluorescence (in situ)           |
| S14-Z   | U-eeeeeeee-X-GLAQAPhe(homo)RSG-rrrrrrrr-X-K(Cy3)-NH2   | Fluorescence (in situ)           |
| S15-Z   | U-eeeeeeee-X-GSPLAQAVRSSG-rrrrrrrr-X-K(Cy3)-NH2        | Fluorescence (in situ)           |
| S16-Z   | U-eeeeeeee-X-GPVPLSLVMG-rrrrrrrr-X-K(5FAM)-NH2         | Fluorescence (in situ)           |
| S17-Z   | U-eeeeeeee-X-GSQPRIVGGG-rrrrrrrr-X-K(Cy5)-NH2          | Fluorescence (in situ)           |
| S18-Z   | U-eeeeeeee-X-GGGHARLVHVG-rrrrrrrr-X-K(Cy3)-NH2         | Fluorescence (in situ)           |
| S19-Z   | U-eeeeeeee-X-GGLGPKGQTGG-rrrrrrrr-X-K(Cy3)-NH2         | Fluorescence (in situ)           |
| S20-Z   | U-eeeeeeee-X-GGQTCKCCKG-rrrrrrrr-X-K(Cy5)-NH2          | Fluorescence (in situ)           |
| dS6-Z   | U-eeeeeeee-X-GsGrsanaG-rrrrrrrr-X-K(Cy5)-NH2           | Fluorescence (in situ)           |
| S6-QZ   | (QSY21)-eeeeeeee-c-o-GSGRSANAG-rrrrrrrr-K(Cy5)-NH2     | Fluorescence (in situ)           |
| dS6-QZ  | (QSY21)-eeeeeeee-c-o-GsGrsanaG-rrrrrrrr-K(Cy5)-NH2     | Fluorescence (in situ)           |
| dS16-Z  | U-eeeeeeee-X-GpvplslvmG-rrrrrrrr-X-K(5FAM)-NH2         | Fluorescence (in situ)           |
| S16-QZ  | (QSY21)-eeeeeeee-c-o-GPVPLSLVMG-rrrrrrrr-K(Cy5)-NH2    | Fluorescence (in situ / in vivo) |
| dS16-QZ | (QSY21)-eeeeeeee-c-o-GpvplslvmG-rrrrrrrr-K(Cy5)-NH2    | Fluorescence (in situ / in vivo) |
| S16     | GPVPLSLVMG                                             | Cleavage motif                   |
| polyR   | rrrrrrrr-X-K(Cy7)-NH2                                  | Fluorescence (in situ)           |

175

176 *Notes:*

177 Lower case: *d*-stereoisomer.

178 Nomenclature: Q = quenched, M = mass barcoded, Z = zymography

179 NH2: amidated C-terminus

180 5FAM-CPQ2: FRET pair, with 5-Carboxyfluorescein as fluorophore and CPQ2 as quencher

181 QSY21-Cy5: FRET pair, with Cy5 as fluorophore and QSY21 as quencher

182 PEG2: diethylene-glycol

183 ANP: 3-Amino-3-(2-nitrophenyl)propionic acid

184 o: 5-amino-3-oxopentanoyl

185 U: succinoyl

186 X: 6-aminohexanoyl

187 Phe(homo): homo-phenylalanine

188 Nval: Norvaline

189 **Supplementary Table S2. Buffer solutions used throughout the study.**

190

| Buffer name / description                  | Recipe                                                                                                                |
|--------------------------------------------|-----------------------------------------------------------------------------------------------------------------------|
| Bead wash buffer                           | 0.5% (w/v) bovine serum albumin (BSA), 0.01% (v/v) Tween-20 in PBS                                                    |
| S6-Z assay buffer                          | 50 mM Tris, 0.01% (v/v) Tween 20, 1% (w/v) BSA, pH 7.4                                                                |
| S2-Z, S10-Z / serine protease assay buffer | 50 mM Tris, 150 mM NaCl, 10 mM CaCl <sub>2</sub> , 0.05% (v/v) Brij-35, 1% (w/v) BSA, pH 7.5                          |
| S16-Z / MMP assay buffer                   | 50 mM Tris, 300 mM NaCl, 10 mM CaCl <sub>2</sub> , 2 μM ZnCl <sub>2</sub> , 0.02% (v/v) Brij-35, 1% (w/v) BSA, pH 7.5 |

191

192

193 **Supplementary Table S3. Protease / AZP pairs for library characterization.**

194

| Protease                   | AZP(s)                                                  |
|----------------------------|---------------------------------------------------------|
| MMP13 (Enzo Life Sciences) | S1-Z, S3-Z, S7-Z, S14-Z, S15-Z, S16-Z, and S19-Z        |
| PRSS3 (R&D Systems)        | S2-Z, S6-Z, S9-Z, S11-Z, S12-Z, S13-Z, S17-Z, and S20-Z |
| KLK14 (R&D Systems)        | S5-Z, S8-Z, and S18-Z                                   |
| KLK2 (R&D Systems)         | S10-Z                                                   |

195

196

197 **Supplementary Table S4. Strategies for profiling protease activity *ex vivo*.**

198

| Assay type                             | Sample type                                        | Throughput                         | Spatial information | Applications                                                                  |
|----------------------------------------|----------------------------------------------------|------------------------------------|---------------------|-------------------------------------------------------------------------------|
| Cleavage of fluorogenic substrates     | Recombinant enzymes, tissue homogenates, biofluids | Single probe per reaction volume.  | No; bulk assay      | Measure substrate cleavage kinetics in real time                              |
| Pooled screen with barcoded substrates | Recombinant enzymes, tissue homogenates, biofluids | Many probes per reaction volume.   | No; bulk assay      | Identify lead probes from substrate library                                   |
| <i>In situ</i> localization with AZPs  | Fresh-frozen tissue sections                       | Small numbers of probes per tissue | Yes                 | Characterize lead probes across tissue sections<br><br>Study protease biology |

199

200 **References**

201

- 202 1. Ellwood-Yen, K. *et al.* Myc-driven murine prostate cancer shares molecular features with  
 203 human prostate tumors. *Cancer Cell* **4**, 223–238 (2003).

204
